# Supplementary material for: MicroRNA-29c-3p acts as a tumor suppressor gene and inhibits tumor progression in hepatocellular carcinoma by targeting TRIM31
Source: PubMed Central journal article supplement — Oncol Rep. 2020 Jan 17;43(3):953–64. doi: 10.3892/or.2020.7469 (PMC7041178; doi:10.3892/or.2020.7469), 2020-01-17
Supplement: Supplementary_Data.pdf [file Supplementary_Data.pdf]

Figure S1. Expression of miR-29c-3p after transfection of the miR-29c-3p inhibitor in MHCC-97H cells. \*P<0.05.

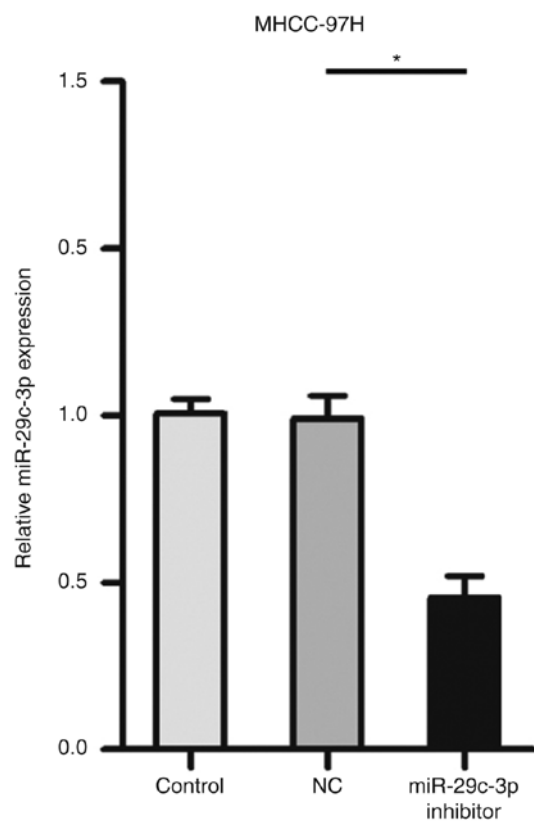

Table SI. Primer sequences for qPCR of miR-29c-3p, TRIM31, U6 and GAPDH.

| Gene symbol | Primer sequence                                                                                  |
|-------------|--------------------------------------------------------------------------------------------------|
| miR-29c-3p  | Forward primers, 5'-ACACTCCAGCTGGGTAGCACCATTTGAAAT-3'<br>Reverse primers, 5'-TGGTGTCGTGGAGTCG-3' |
| TRIM31      | Forward primers, 5'-CTGCGAGATGAGGATAACCATTG-3'<br>Reverse primers, 5'-TTTGACCGCTAATCTGATGAAT-3'  |
| U6          | Forward primers, 5'-CTCGCTTCGGCAGCACA-3'<br>Reverse primers, 5'-AACGCTTCACGAATTTGCGT-3'          |
| GAPDH       | Forward primers, 5'-TGGGTGTGAACCATGAGAAGT-3'<br>Reverse primers, 5'-TGAGTCCTTCCACGATACCAA-3'     |
